# Supplementary material for: A new tool for validating theoretically derived anisotropic displacement parameters with experiment: directionality of prolate displacement ellipsoids
Source: Royal Society of Chemistry journal article supplement (doi:10.1039/c9ce00794f), 2019-01-01
Supplement: c9ce00794f1.pdf [file c9ce00794f1.pdf]

### Supporting Information

A new tool for validating theoretically derived anisotropic displacement parameters  
with experiment: directionality of prolate displacement ellipsoids.

D. Mroz, J. George, M. Kremer, R. Wang, U. Englert, R. Dronskowski

**Table S1** Crystal data, data collection parameters and convergence results for **2**.

|                                                                                                                |                                                                               |
|----------------------------------------------------------------------------------------------------------------|-------------------------------------------------------------------------------|
| Crystal data                                                                                                   |                                                                               |
| Chemical formula                                                                                               | C <sub>6</sub> H <sub>14</sub> N <sub>4</sub> NiO <sub>2</sub> S <sub>2</sub> |
| <i>M</i> (g mol <sup>-1</sup> )                                                                                | 297.04                                                                        |
| Crystal system, space group (No.)                                                                              | Monoclinic, <i>P</i> 2 <sub>1</sub> / <i>c</i> (14)                           |
| Temperature (K)                                                                                                | 100                                                                           |
| <i>a, b, c</i> (Å)                                                                                             | 8.505(4), 9.781(4), 7.345(3)                                                  |
| <i>α, β, γ</i> (°)                                                                                             | 90, 96.148(7), 90                                                             |
| <i>V</i> (Å <sup>3</sup> )                                                                                     | 607.6(5)                                                                      |
| <i>Z</i>                                                                                                       | 2                                                                             |
| Radiation type                                                                                                 | Mo <i>Kα</i>                                                                  |
| <i>μ</i> (mm <sup>-1</sup> )                                                                                   | 1.927                                                                         |
| Crystal size (mm)                                                                                              | 0.25 × 0.25 × 0.07                                                            |
| Data collection                                                                                                |                                                                               |
| Diffractometer                                                                                                 | Bruker APEX CCD                                                               |
| Absorption correction                                                                                          | multi-scan <i>SADABS</i> (Bruker, 2008)                                       |
| <i>T</i> <sub>min</sub> , <i>T</i> <sub>max</sub>                                                              | 0.548, 0.746                                                                  |
| No. of measured, independent, observed<br>[ <i>I</i> > 2σ( <i>I</i> )] reflections                             | 9002, 1816, 1596                                                              |
| <i>R</i> <sub>int</sub>                                                                                        | 0.0355                                                                        |
| Scan range (θ <sub>min</sub> / θ <sub>max</sub> )                                                              | 2.4/30.9                                                                      |
| Refinement results                                                                                             |                                                                               |
| <i>R</i> [ <i>F</i> <sup>2</sup> > 2σ( <i>F</i> <sup>2</sup> )], <i>wR</i> ( <i>F</i> <sup>2</sup> ), <i>S</i> | 0.0277, 0.0625, 1.047                                                         |
| No. of reflections                                                                                             | 1816                                                                          |
| No of parameters                                                                                               | 82                                                                            |
| No. of restraints                                                                                              | 0                                                                             |
| Δρ <sub>max</sub> , Δρ <sub>min</sub> (e Å <sup>-3</sup> )                                                     | 0.558, -0.470                                                                 |

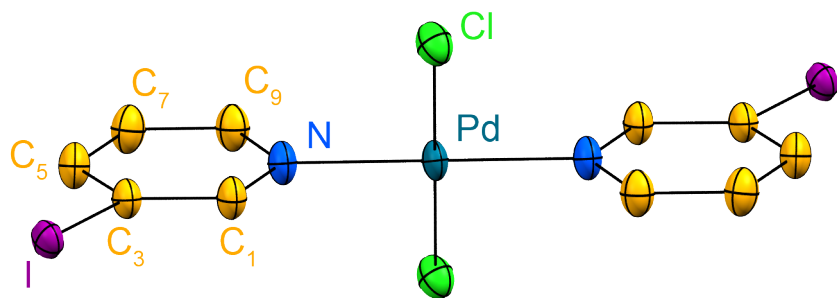

**Fig. S1** Displacement ellipsoids in the harmonic approximation for compound **1** at 100 K, drawn at the 90% probability level.

**Table S2** Theoretical ADPs ( $\text{\AA}^2$ ) for **1** at 100 K.

| Atom | $U_{11}$ | $U_{22}$ | $U_{33}$ | $U_{23}$ | $U_{13}$ | $U_{12}$ |
|------|----------|----------|----------|----------|----------|----------|
| I    | 0.010412 | 0.010608 | 0.007304 | 0.002111 | 0.003070 | 0.002558 |
| Pd   | 0.011035 | 0.007139 | 0.005234 | 0.001531 | 0.002131 | 0.001766 |
| Cl   | 0.013123 | 0.011192 | 0.008184 | 0.000380 | 0.001894 | 0.000829 |
| N    | 0.013076 | 0.008264 | 0.006677 | 0.001835 | 0.002323 | 0.002336 |
| C1   | 0.012880 | 0.008685 | 0.007250 | 0.002025 | 0.002555 | 0.003105 |
| C3   | 0.010879 | 0.009058 | 0.007047 | 0.002063 | 0.001859 | 0.002120 |
| C5   | 0.014773 | 0.008766 | 0.008541 | 0.002410 | 0.001978 | 0.003032 |
| C7   | 0.016463 | 0.008882 | 0.009182 | 0.001027 | 0.002102 | 0.004219 |
| C9   | 0.015275 | 0.009549 | 0.007827 | 0.000973 | 0.002890 | 0.003495 |

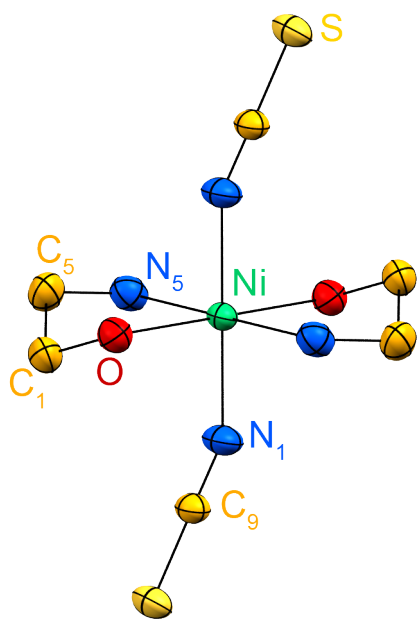

**Fig. S2** As in Fig. S1 but for **2**.

**Table S3** As in Table S2 but for **2**.

| Atom | $U_{11}$ | $U_{22}$ | $U_{33}$ | $U_{23}$  | $U_{13}$  | $U_{12}$  |
|------|----------|----------|----------|-----------|-----------|-----------|
| Ni1  | 0.009243 | 0.008550 | 0.010579 | -0.000073 | 0.001210  | -0.001420 |
| S1   | 0.012490 | 0.014980 | 0.015485 | 0.001733  | -0.000993 | -0.004551 |
| N1   | 0.014504 | 0.011550 | 0.017578 | 0.000080  | 0.001978  | -0.004210 |
| N5   | 0.013180 | 0.014970 | 0.013242 | -0.002363 | 0.002181  | -0.001773 |
| O1   | 0.012388 | 0.013200 | 0.013591 | -0.000179 | 0.000290  | -0.000228 |
| C1   | 0.010967 | 0.014300 | 0.017172 | -0.001582 | 0.000498  | 0.000319  |
| C5   | 0.014803 | 0.014980 | 0.018658 | -0.004470 | 0.002092  | 0.001694  |
| C9   | 0.011553 | 0.009970 | 0.013133 | 0.000779  | 0.000992  | -0.001788 |

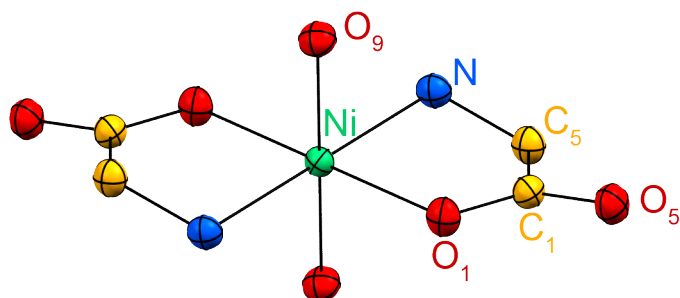**Fig. S3** As in Fig. S1 but for **3**.**Table S4** As in Table S2 but for **3**.

| Atom | $U_{11}$ | $U_{22}$ | $U_{33}$ | $U_{23}$  | $U_{13}$ | $U_{12}$  |
|------|----------|----------|----------|-----------|----------|-----------|
| Ni1  | 0.006242 | 0.006420 | 0.006547 | 0.000060  | 0.003447 | -0.000045 |
| O1   | 0.009291 | 0.009130 | 0.010793 | 0.001730  | 0.006175 | 0.000949  |
| O5   | 0.009984 | 0.009490 | 0.011195 | 0.002910  | 0.004096 | 0.001142  |
| O9   | 0.009939 | 0.009520 | 0.009106 | -0.001230 | 0.004828 | -0.000493 |
| N1   | 0.007802 | 0.008780 | 0.009118 | 0.000482  | 0.004471 | -0.000431 |
| C1   | 0.007712 | 0.007680 | 0.007519 | 0.000510  | 0.003463 | 0.000057  |
| C5   | 0.008418 | 0.009270 | 0.009405 | 0.000529  | 0.005029 | 0.000621  |

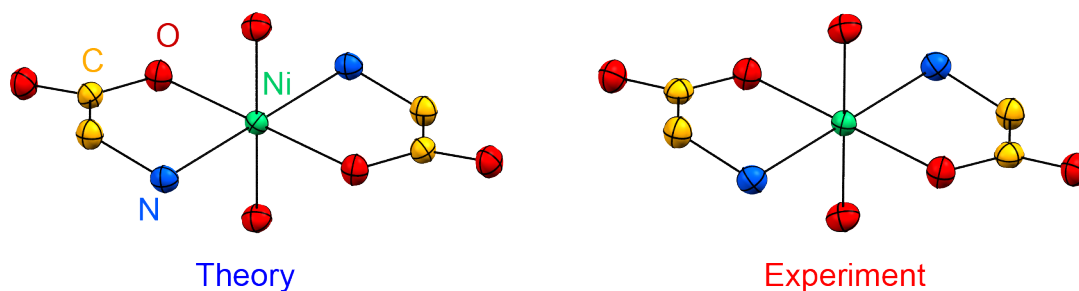**Fig. S4** Comparison of theoretical (left) and experimental (right) thermal ellipsoids of **3** at 100 K. All ellipsoids are drawn at the 90% probability level.

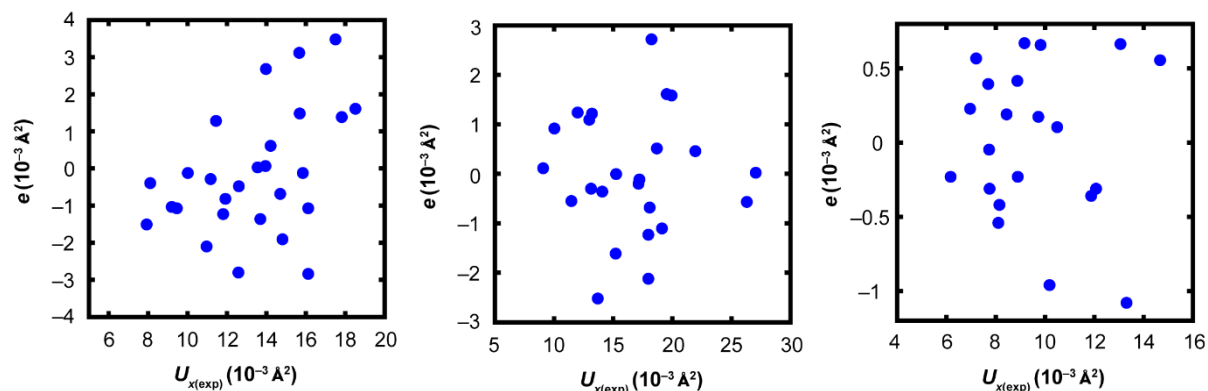

**Fig. S5** Residuals for compound **1** (left), **2** (centre) and **3** (right).

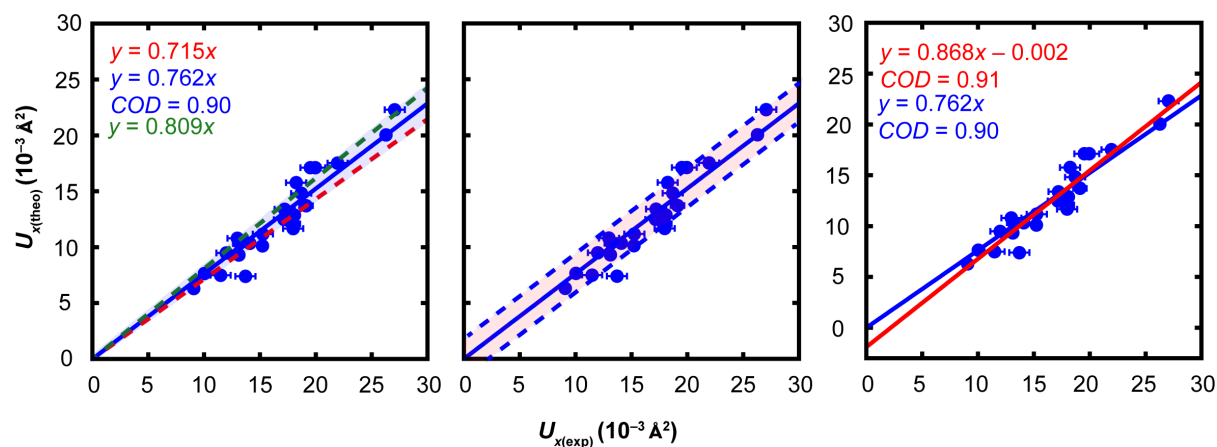

**Fig. S6** Left: Scatter plot of theoretical main-axis components for all non-hydrogen atoms in **2** (theoretical ADPs based on the D2 correction) against the experimental values at 100 K, including a linear fit (blue) with its coefficient of determination ( $COD$ ) and the two limiting slopes for three standard uncertainties ( $su$ ) (red - lower limit, green - upper limit), corresponding to 99.7 % of the values in a Gaussian distribution. Centre: Scatter plot for **2** (blue) with tolerance interval representing a population of 90 % with a confidence of 99 % (light red, enclosed by dotted blue lines). Right: Comparison of the origin fit (blue) and a non-origin fit (red) for **1** with their  $COD$ s. In all plots, horizontal lines represent error bars of three  $su$ s in experimental data.

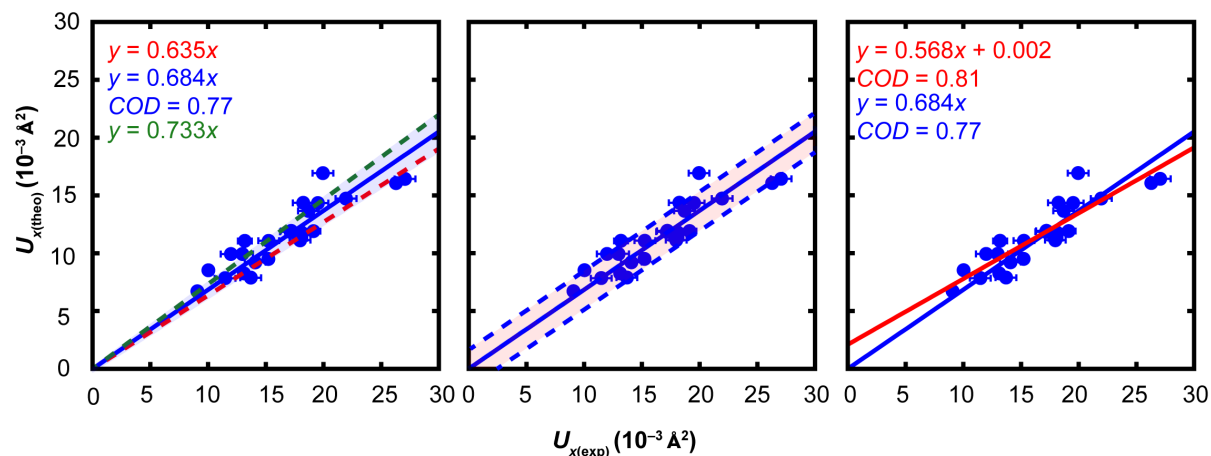

**Fig. S7** As in Fig. S6 but for theoretical ADPs based on the TS correction.

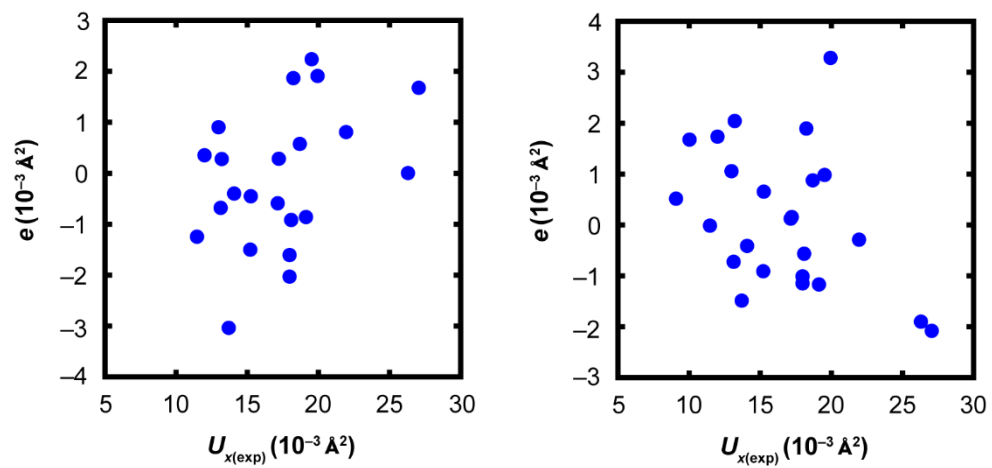

**Fig. S8** Left: Residuals for compound **2** (D2 correction). Right: Residuals for compound **2** (TS correction).
